# Supplementary material
Source: publisher site journal article supplement (https://www.spandidos-publications.com/7626/downloadSupplementary)

Figure S1. The relationship between WSB2 expression and tumor pathological stage, evaluated using UALCAN. (A) Expression of WSB2 in individual cancer stages of BRCA, CHOL, CESC, LIHC, LUSC, and UCEC. (B) Expression of WSB2 in individual cancer stages of COAD, KICH, READ, and THCA. Compared with normal, \* $P < 0.05$ ; \*\* $P < 0.01$ ; \*\*\* $P < 0.001$  vs. normal. TCGA, The Cancer Genome Atlas; BRCA, breast invasive carcinoma; LIHC, liver hepatocellular carcinoma; CESC, cervical squamous cell carcinoma; LUSC, lung squamous cell carcinoma; CHOL, cholangiocarcinoma; uterine corpus endometrial carcinoma; COAD, colon adenocarcinoma; KICH, kidney chromophobe; THCA, thyroid carcinoma; READ, Rectum Adenocarcinoma.

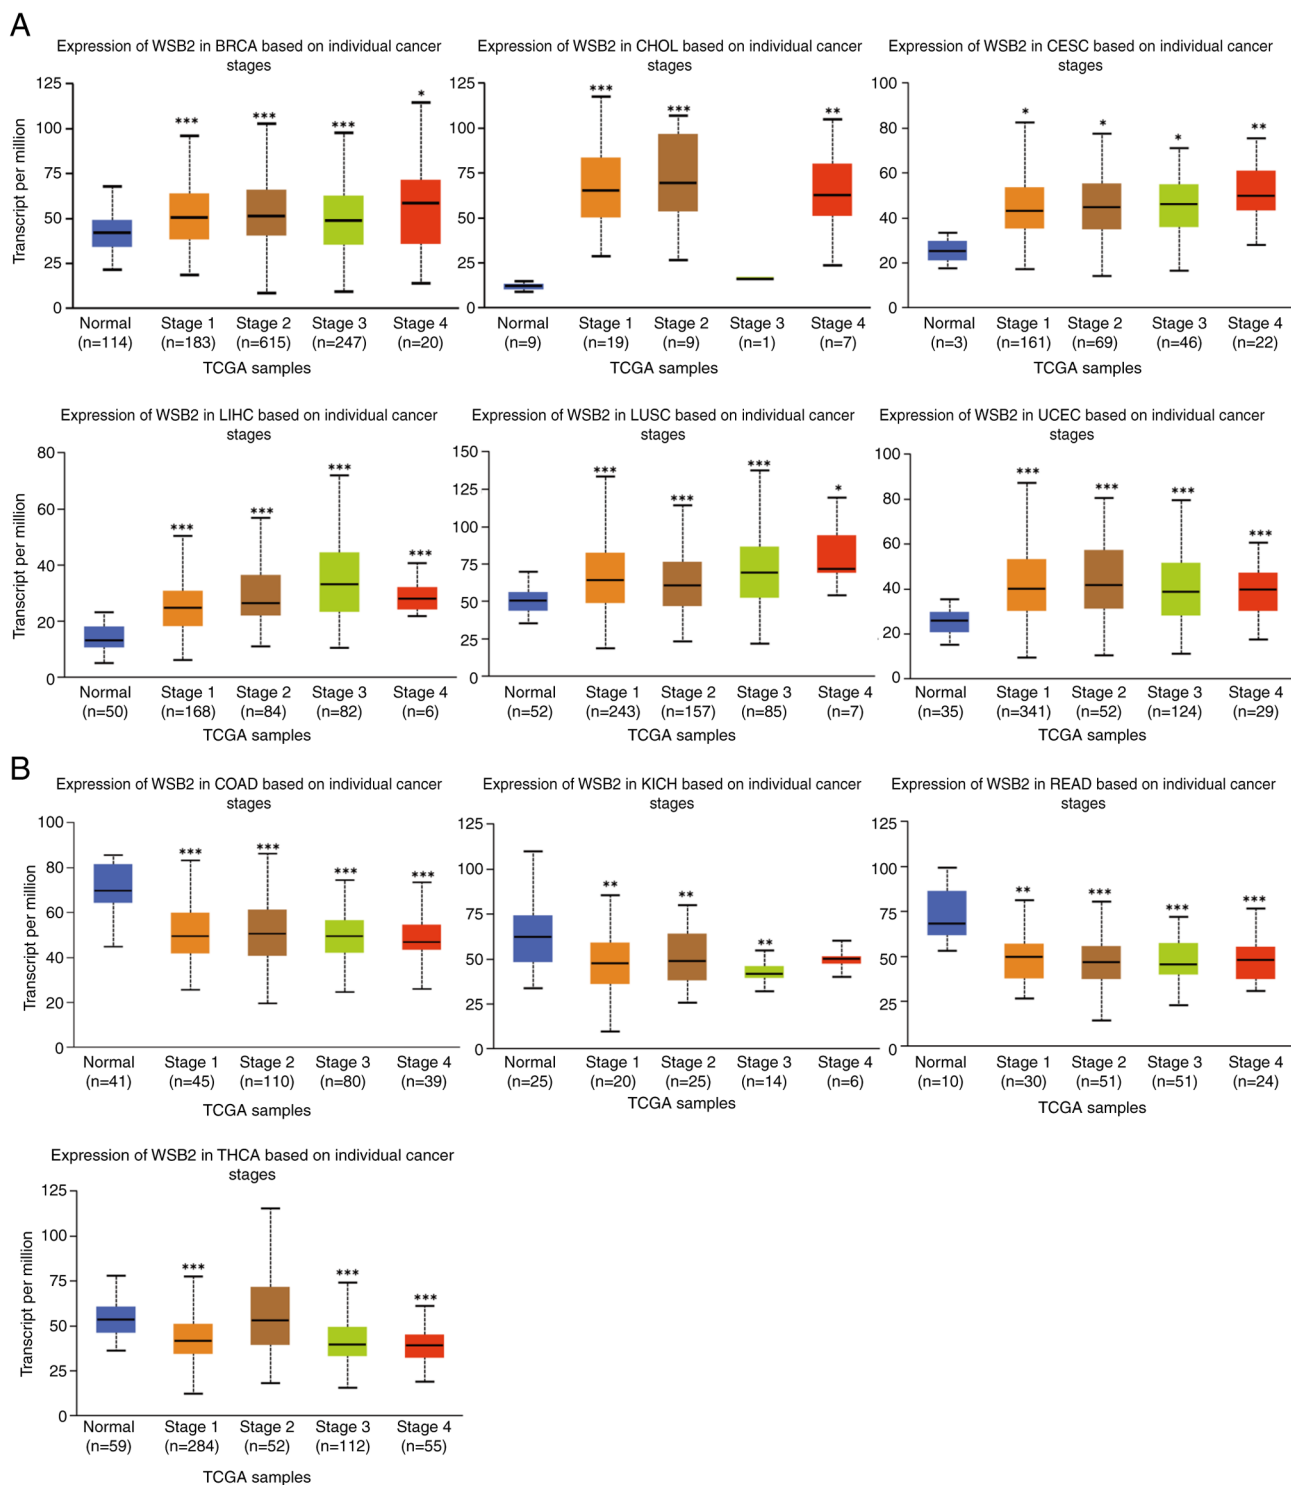

Supplement: Supplementary file 1 [file downloadSupplementary]
